# Supplementary material for: Idarucizumab for Emergency Reversal of the Anticoagulant Effects of Dabigatran: Final Results of a Japanese Postmarketing Surveillance Study
Source: Springer Nature journal article supplement (doi:10.1007/s40119-023-00333-6), 2023-10-17
Supplement: MOESM1 [file 26191126]

## Supplementary Material

### Title:

Idarucizumab for Emergency Reversal of the Anticoagulant Effects of Dabigatran: Final Results of a Japanese Postmarketing Surveillance Study

### Authors:

Masahiro Yasaka · Hiroyuki Yokota · Michiyasu Suzuki · Hidesaku Asakura · Teiichi Yamane · Yukako Ogi · Takaaki Kimoto · Daisuke Nakayama

### Affiliations:

M. Yasaka

Department of Cerebrovascular Medicine and Neurology, Cerebrovascular Center, Clinical Research Institute, National Hospital Organization Kyushu Medical Center, Fukuoka, Japan

H. Yokota

Graduate School of Medical & Health Science, Nippon Sport Science University, Kanagawa, Japan

M. Suzuki

Department of Neurosurgery, Yamaguchi University School of Medicine, Yamaguchi, Japan

H. Asakura

Department of Hematology, Kanazawa University Hospital, Ishikawa, Japan

T. Yamane

Department of Cardiology, Jikei University School of Medicine, Tokyo, Japan

Y. Ogi · D. Nakayama

Medicine Division, Nippon Boehringer Ingelheim Co., Ltd., Tokyo, Japan

T. Kimoto

PMS Division, EPS Corporation, Tokyo, Japan

### Correspondence:

Dr Masahiro Yasaka

E-mail: [yasakamasahiro@gmail.com](mailto:yasakamasahiro@gmail.com)

**Fig. S1** Study design

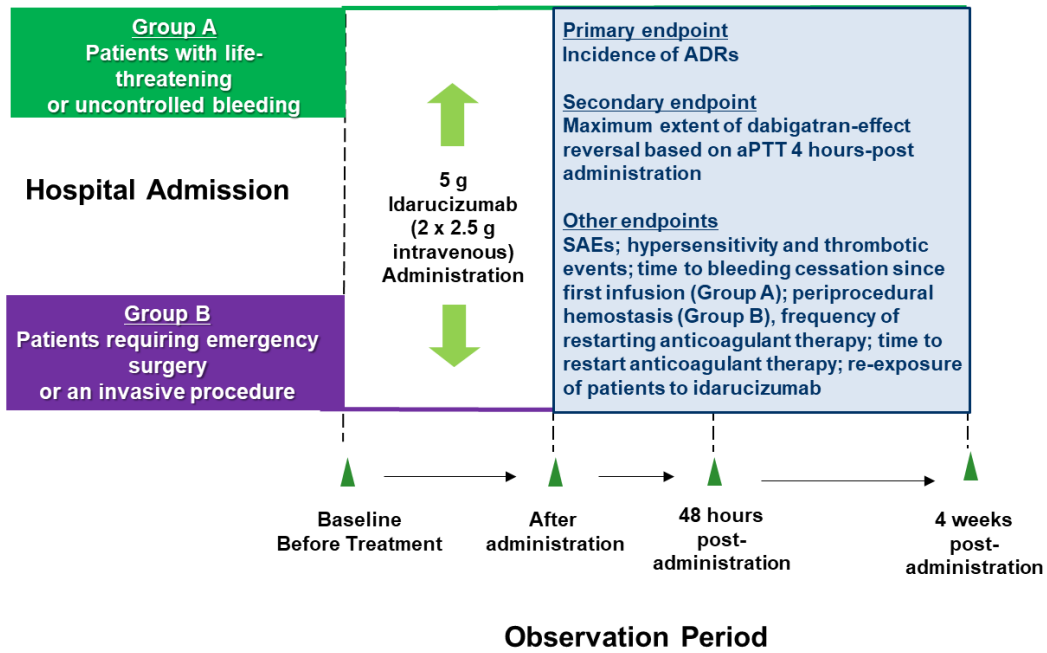

ADR adverse drug reaction, aPTT activated partial thromboplastin time, SAE serious adverse event

**Table S1** Changing trends in reasons for using idarucizumab in Group A/A+B

|                   | Number of patients, <i>N</i> (%)  |                                                       |                                                       |                                                       |                                                       |                                       |
|-------------------|-----------------------------------|-------------------------------------------------------|-------------------------------------------------------|-------------------------------------------------------|-------------------------------------------------------|---------------------------------------|
|                   | ≤Apr 15, 2017<br>( <i>N</i> = 70) | Apr 16, 2017, to<br>Nov 15, 2017<br>( <i>N</i> = 130) | Nov 16, 2017, to<br>Apr 15, 2018<br>( <i>N</i> = 116) | Apr 16, 2018, to<br>Nov 15, 2018<br>( <i>N</i> = 118) | Nov 16, 2018, to<br>Apr 15, 2019<br>( <i>N</i> = 124) | Entire<br>period<br>( <i>N</i> = 558) |
| Bleeding location |                                   |                                                       |                                                       |                                                       |                                                       |                                       |
| Intraspinal       | 0 (0.0)                           | 0 (0.0)                                               | 0 (0.0)                                               | 0 (0.0)                                               | 1 (0.8)                                               | 1 (0.2)                               |
| Intramuscular     | 1 (1.4)                           | 2 (1.5)                                               | 3 (2.6)                                               | 4 (3.4)                                               | 2 (1.6)                                               | 12 (2.2)                              |
| Retroperitoneal   | 1 (1.4)                           | 6 (4.6)                                               | 3 (2.6)                                               | 1 (0.9)                                               | 3 (2.4)                                               | 14 (2.5)                              |
| Intra-articular   | 0 (0.0)                           | 0 (0.0)                                               | 0 (0.0)                                               | 1 (0.9)                                               | 0 (0.0)                                               | 1 (0.2)                               |
| Intrapericardial  | 3 (4.3)                           | 15 (11.5)                                             | 24 (20.7)                                             | 32 (27.1)                                             | 32 (25.8)                                             | 106 (19.0)                            |
| Gastrointestinal  | 19 (27.1)                         | 38 (29.2)                                             | 30 (25.9)                                             | 22 (18.6)                                             | 24 (19.4)                                             | 133 (23.9)                            |
| Intracranial      | 36 (51.4)                         | 52 (40.0)                                             | 42 (36.2)                                             | 38 (32.2)                                             | 40 (32.3)                                             | 208 (37.3)                            |
| Other             | 12 (17.1)                         | 24 (18.5)                                             | 18 (15.5)                                             | 25 (21.2)                                             | 30 (24.2)                                             | 109 (19.5)                            |

**Table S2** ADRs judged by the investigators to be related to idarucizumab<sup>a</sup>

|                             | <b>Group A<br/>(N = 542)</b> | <b>Group B<br/>(N = 240)</b> | <b>Total<br/>(N = 804)</b> |
|-----------------------------|------------------------------|------------------------------|----------------------------|
| No. patients with ADRs      | 17 (3.1)                     | 12 (5.0)                     | 29 (3.6)                   |
| Infections and infestations | 1 (0.2)                      | 0                            | 1 (0.1)                    |
| Pneumonia aspiration        | 1 (0.2)                      | 0                            | 1 (0.1)                    |
| Nervous system disorders    | 6 (1.1)                      | 5 (2.1)                      | 11 (1.4)                   |
| Cerebral infarction         | 1 (0.2)                      | 4 (1.7)                      | 5 (0.6)                    |
| Cerebral hemorrhage         | 1 (0.2)                      | 0                            | 1 (0.1)                    |
| Embolic stroke              | 1 (0.2)                      | 0                            | 1 (0.1)                    |
| Seizure                     | 0                            | 1 (0.4)                      | 1 (0.1)                    |
| Subarachnoid hemorrhage     | 1 (0.2)                      | 0                            | 1 (0.1)                    |
| Spinal cord hemorrhage      | 1 (0.2)                      | 0                            | 1 (0.1)                    |
| Embolic cerebral infarction | 1 (0.2)                      | 0                            | 1 (0.1)                    |
| Eye disorders               | 1 (0.2)                      | 0                            | 1 (0.1)                    |
| Eye hematoma                | 1 (0.2)                      | 0                            | 1 (0.1)                    |
| Cardiac disorders           | 1 (0.2)                      | 0                            | 1 (0.1)                    |
| Acute myocardial infarction | 1 (0.2)                      | 0                            | 1 (0.1)                    |
| Vascular disorders          | 4 (0.7)                      | 1 (0.4)                      | 5 (0.6)                    |
| Aortic aneurysm rupture     | 1 (0.2)                      | 0                            | 1 (0.1)                    |
| Shock                       | 1 (0.2)                      | 0                            | 1 (0.1)                    |

|                                                      |         |         |         |
|------------------------------------------------------|---------|---------|---------|
| Deep vein thrombosis                                 | 1 (0.2) | 0       | 1 (0.1) |
| Hemorrhage                                           | 1 (0.2) | 0       | 1 (0.1) |
| Arterial occlusive disease                           | 0       | 1 (0.4) | 1 (0.1) |
| Respiratory, thoracic, and mediastinal disorders     | 1 (0.2) | 0       | 1 (0.1) |
| Hemothorax                                           | 1 (0.2) | 0       | 1 (0.1) |
| Gastrointestinal disorders                           | 2 (0.4) | 2 (0.8) | 4 (0.5) |
| Abdominal discomfort                                 | 0       | 1 (0.4) | 1 (0.1) |
| Melena                                               | 0       | 1 (0.4) | 1 (0.1) |
| Rectal ulcer hemorrhage                              | 1 (0.2) | 0       | 1 (0.1) |
| Pancreatic enlargement                               | 1 (0.2) | 0       | 1 (0.1) |
| Skin and subcutaneous tissue disorders               | 2 (0.4) | 0       | 2 (0.2) |
| Erythema                                             | 1 (0.2) | 0       | 1 (0.1) |
| Skin discoloration                                   | 1 (0.2) | 0       | 1 (0.1) |
| General disorders and administrative site conditions | 0       | 2 (0.8) | 2 (0.2) |
| Death                                                | 0       | 1 (0.4) | 1 (0.1) |
| Malaise                                              | 0       | 1 (0.4) | 1 (0.1) |
| Investigations                                       | 3 (0.6) | 0       | 3 (0.4) |
| Aspartate aminotransferase increased                 | 1 (0.2) | 0       | 1 (0.1) |
| Blood pressure decreased                             | 1 (0.2) | 0       | 1 (0.1) |
| International normalized ratio increased             | 1 (0.2) | 0       | 1 (0.1) |

|                                                |         |         |         |
|------------------------------------------------|---------|---------|---------|
| Injury, poisoning and procedural complications | 1 (0.2) | 2 (0.8) | 3 (0.4) |
| Subdural hematoma                              | 0       | 2 (0.8) | 2 (0.2) |
| Extradural hematoma                            | 1 (0.2) | 0       | 1 (0.1) |
| Subdural hemorrhage                            | 1 (0.2) | 0       | 1 (0.1) |

---

*Note:* Data are presented as *n* (%)

*ADR* adverse drug reaction

<sup>a</sup> ADRs that occurred in both the treatment and post-treatment periods are reported. ADRs were coded using Version 24.1 of the Medical Dictionary for Regulatory Activities

**Table S3** ADRs by bleeding location<sup>a</sup>

| <b>Bleeding location</b>                        | <b>Group A</b> | <b>Group A+B</b> | <b>Total</b> |
|-------------------------------------------------|----------------|------------------|--------------|
| Intracranial ( <i>n</i> )                       | 196            | 12               | 208          |
| Patients with ADRs                              | 7 (3.6)        | 0                | 7 (3.4)      |
| Infections and infestations                     | 1 (0.5)        | 0                | 1 (0.5)      |
| Pneumonia aspiration                            | 1 (0.5)        | 0                | 1 (0.5)      |
| Nervous system disorders                        | 4 (2.0)        | 0                | 4 (1.9)      |
| Cerebral hemorrhage                             | 1 (0.5)        | 0                | 1 (0.5)      |
| Cerebral infarction                             | 1 (0.5)        | 0                | 1 (0.5)      |
| Embolic stroke                                  | 1 (0.5)        | 0                | 1 (0.5)      |
| Subarachnoid hemorrhage                         | 1 (0.5)        | 0                | 1 (0.5)      |
| Vascular disorders                              | 1 (0.5)        | 0                | 1 (0.5)      |
| Hemorrhage                                      | 1 (0.5)        | 0                | 1 (0.5)      |
| Gastrointestinal disorders                      | 1 (0.5)        | 0                | 1 (0.5)      |
| Pancreatic enlargement                          | 1 (0.5)        | 0                | 1 (0.5)      |
| Skin and subcutaneous tissue disorders          | 1 (0.5)        | 0                | 1 (0.5)      |
| Skin discoloration                              | 1 (0.5)        | 0                | 1 (0.5)      |
| Investigations                                  | 1 (0.5)        | 0                | 1 (0.5)      |
| International normalized ratio increased        | 1 (0.5)        | 0                | 1 (0.5)      |
| Injury, poisoning, and procedural complications | 1 (0.5)        | 0                | 1 (0.5)      |

|                                               |         |   |         |
|-----------------------------------------------|---------|---|---------|
| Extradural hematoma                           | 1 (0.5) | 0 | 1 (0.5) |
| Subdural hemorrhage                           | 1 (0.5) | 0 | 1 (0.5) |
| Gastrointestinal ( <i>n</i> )                 | 132     | 1 | 133     |
| Patients with ADRs                            | 3 (2.3) | 0 | 3 (2.3) |
| Vascular disorders                            | 1 (0.8) | 0 | 1 (0.8) |
| Deep vein thrombosis                          | 1 (0.8) | 0 | 1 (0.8) |
| Gastrointestinal disorders                    | 1 (0.8) | 0 | 1 (0.8) |
| Rectal ulcer hemorrhage                       | 1 (0.8) | 0 | 1 (0.8) |
| Skin and subcutaneous tissue disorders        | 1 (0.8) | 0 | 1 (0.8) |
| Erythema                                      | 1 (0.8) | 0 | 1 (0.8) |
| Gastrointestinal – lower only ( <i>n</i> )    | 61      | 0 | 61      |
| Patients with ADRs                            | 3 (4.9) | 0 | 3 (4.9) |
| Deep vein thrombosis                          | 1 (1.6) | 0 | 1 (1.6) |
| Erythema                                      | 1 (1.6) | 0 | 1 (1.6) |
| Rectal ulcer hemorrhage                       | 1 (1.6) | 0 | 1 (1.6) |
| Gastrointestinal – upper only ( <i>n</i> )    | 52      | 0 | 52      |
| Patients with ADRs                            | 0       | 0 | 0       |
| Gastrointestinal – lower + upper ( <i>n</i> ) | 5       | 0 | 5       |
| Patients with ADRs                            | 0       | 0 | 0       |
| Gastrointestinal – unknown ( <i>n</i> )       | 14      | 0 | 14      |



|                                      |         |   |         |
|--------------------------------------|---------|---|---------|
| Patients with ADRs                   | 0       | 0 | 0       |
| Intrapericardial ( <i>n</i> )        | 104     | 2 | 106     |
| Patients with ADRs                   | 1 (1.0) | 0 | 1 (0.9) |
| Investigations                       | 1 (1.0) | 0 | 1 (0.9) |
| Aspartate aminotransferase increased | 1 (1.0) | 0 | 1 (0.9) |
| Retroperitoneal ( <i>n</i> )         | 14      | 0 | 14      |
| Patients with ADRs                   | 1 (7.1) | 0 | 1 (7.1) |
| Vascular disorders                   | 1 (7.1) | 0 | 1 (7.1) |
| Aortic aneurysm rupture              | 1 (7.1) | 0 | 1 (7.1) |
| Intramuscular ( <i>n</i> )           | 12      | 0 | 12      |
| Patients with ADRs                   | 0       | 0 | 0       |

---

*Note:* Data are presented as *n* (%) unless otherwise specified

*ADR* adverse drug reaction

<sup>a</sup> ADRs that occurred in both the treatment and post-treatment periods are reported. ADRs were coded using Version 24.1 of the Medical Dictionary for Regulatory Activities

**Table S4** ADRs by type of surgery/procedure<sup>a</sup>

| Type of surgery/procedure                       | Group B | Group A+B | Total   |
|-------------------------------------------------|---------|-----------|---------|
| Neurological surgery/procedure ( <i>n</i> )     | 103     | 11        | 114     |
| Patients with ADRs                              | 6 (5.8) | 0         | 6 (5.3) |
| Nervous system disorders                        | 3 (2.9) | 0         | 3 (2.6) |
| Cerebral infarction                             | 2 (1.9) | 0         | 2 (1.8) |
| Seizure                                         | 1 (1.0) | 0         | 1 (0.9) |
| Vascular disorders                              | 1 (1.0) | 0         | 1 (0.9) |
| Arterial occlusive disease                      | 1 (1.0) | 0         | 1 (0.9) |
| Gastrointestinal disorders                      | 1 (1.0) | 0         | 1 (0.9) |
| Abdominal discomfort                            | 1 (1.0) | 0         | 1 (0.9) |
| Injury, poisoning, and procedural complications | 1 (1.0) | 0         | 1 (0.9) |
| Subdural hematoma                               | 1 (1.0) | 0         | 1 (0.9) |
| Vascular surgery/procedure ( <i>n</i> )         | 38      | 2         | 40      |
| Patients with ADRs                              | 1 (2.6) | 0         | 1 (2.5) |
| Nervous system disorders                        | 1 (2.6) | 0         | 1 (2.5) |
| Cerebral infarction                             | 1 (2.6) | 0         | 1 (2.5) |
| Abdominal surgery/procedure ( <i>n</i> )        | 37      | 1         | 38      |
| Patients with ADRs                              | 1 (2.7) | 0         | 1 (2.6) |
| Gastrointestinal disorders                      | 1 (2.7) | 0         | 1 (2.6) |

|                                                |         |   |         |
|------------------------------------------------|---------|---|---------|
| Melena                                         | 1 (2.7) | 0 | 1 (2.6) |
| Orthopedic surgery/procedure (n)               | 8       | 0 | 8       |
| Patients with ADRs                             | 0       | 0 | 0       |
| Respiratory surgery/procedure (n)              | 7       | 0 | 7       |
| Patients with ADRs                             | 0       | 0 | 0       |
| Gynecological-urological surgery/procedure (n) | 6       | 0 | 6       |
| Patients with ADRs                             | 0       | 0 | 0       |

---

*Note:* Data are presented as *n* (%) unless otherwise specified

*ADR* adverse drug reaction

<sup>a</sup> ADRs that occurred in both the treatment and post-treatment periods are reported. ADRs were coded using Version 24.1 of the Medical Dictionary for Regulatory Activities

**TABLE S5** Patients with adverse events leading to death within 5 days of idarucizumab administration

| Group | Age (years) | Sex | AE that led to death (PT)                                                                           | Time from treatment to death (days) | Reason for administration of idarucizumab       |
|-------|-------------|-----|-----------------------------------------------------------------------------------------------------|-------------------------------------|-------------------------------------------------|
| A, B  | 76          | F   | Pericardial hemorrhage                                                                              | 2                                   | Intrapericardial bleeding, pericardiocentesis   |
|       | 65          | F   | Upper gastrointestinal hemorrhage<br>Shock hemorrhagic                                              | 1                                   | Gastrointestinal bleeding                       |
|       | 75          | M   | Brain edema                                                                                         | 2                                   | Intracranial hemorrhage, surgery for hematoma   |
| A     | 74          | F   | Pneumonia aspiration<br>Cardiac failure congestive<br>Brain herniation<br>Epilepsy                  | 3                                   | Gastrointestinal bleeding                       |
|       | 80          | M   | Pneumonia bacterial                                                                                 | Unknown                             | Pulmonary hemorrhage                            |
|       | 83          | F   | Shock hemorrhagic<br>Mesenteric arterial occlusion                                                  | 1                                   | Gastrointestinal bleeding                       |
|       | 84          | M   | Hemorrhage                                                                                          | 1                                   | Intracranial, intrathoracic hemorrhage          |
|       | 81          | M   | Shock hemorrhagic                                                                                   | 2                                   | Intra-abdominal hemorrhage                      |
|       | 75          | M   | Bronchial hemorrhage<br>Respiratory failure                                                         | 3                                   | Pulmonary hemorrhage                            |
|       | 83          | M   | Rib fracture<br>Road traffic accident<br>Spinal fracture<br>Traumatic shock<br>Traumatic hemothorax | 1                                   | Intrathoracic hemorrhage                        |
|       | 84          | F   | Cerebellar hemorrhage                                                                               | 5                                   | Intracranial hemorrhage                         |
|       | 71          | F   | Cerebral hemorrhage                                                                                 | 1                                   | Intracranial hemorrhage                         |
|       | 67          | M   | Gastrointestinal hemorrhage<br>Pneumonia<br>Pulmonary alveolar hemorrhage                           | 1                                   | Gastrointestinal bleeding, pulmonary hemorrhage |
|       | 78          | F   | Cardiac tamponade                                                                                   | 1                                   | Intrapericardial bleeding                       |
|       | 85          | M   | Subdural hematoma                                                                                   | 4                                   | Intracranial hemorrhage                         |
|       | 65          | M   | Retroperitoneal hemorrhage                                                                          | 2                                   | Retroperitoneal bleeding                        |
|       | 82          | M   | Shock hemorrhagic                                                                                   | 1                                   | Gastrointestinal bleeding                       |

|    |   |                                                                                               |   |                                             |
|----|---|-----------------------------------------------------------------------------------------------|---|---------------------------------------------|
| 82 | F | Cardiac tamponade<br>Ventricle rupture                                                        | 1 | Intrapericardial bleeding                   |
| 81 | F | Cardiac failure congestive<br>Peripheral circulatory failure                                  | 4 | Retroperitoneal bleeding                    |
| 82 | M | Disseminated intravascular coagulation<br>Shock hemorrhagic                                   | 3 | Gastrointestinal and urinary tract bleeding |
| 91 | M | Subdural hematoma                                                                             | 1 | Intracranial hemorrhage                     |
| 83 | M | Subdural hematoma                                                                             | 1 | Intracranial hemorrhage                     |
| 89 | M | Embolic stroke                                                                                | 2 | Intracranial hemorrhage                     |
| 80 | M | Aortic aneurysm rupture                                                                       | 1 | Retroperitoneal bleeding                    |
| 81 | M | Subdural hematoma                                                                             | 2 | Intracranial hemorrhage                     |
| 82 | M | Cerebellar hemorrhage                                                                         | 1 | Intracranial hemorrhage                     |
| 78 | F | Renal failure<br>Cardiac failure chronic<br>Malignant neoplasm progression                    | 2 | Gastrointestinal, intraoral bleeding        |
| 76 | F | Malignant neoplasm                                                                            | 1 | Hematuria                                   |
| 83 | M | Subdural hematoma                                                                             | 3 | Intracranial hemorrhage                     |
| 81 | M | Cerebral hemorrhage<br>Hypertension                                                           | 2 | Intracranial hemorrhage                     |
| 83 | M | Intra-abdominal hematoma<br>Tumor rupture                                                     | 1 | Intra-abdominal hemorrhage                  |
| 68 | M | Brain edema<br>Brain stem hemorrhage                                                          | 3 | Intracranial hemorrhage                     |
| 82 | F | Multiple organ dysfunction syndrome<br>Shock hemorrhagic<br>Lower gastrointestinal hemorrhage | 1 | Gastrointestinal bleeding                   |
| 83 | F | Hemorrhage intracranial                                                                       | 4 | Intracranial hemorrhage                     |
| 84 | F | Multiple organ dysfunction syndrome<br>Acute coronary syndrome                                | 5 | Gastrointestinal, intraoral bleeding        |
| 88 | F | Death                                                                                         | 1 | Intracranial hemorrhage                     |
| 84 | M | Subarachnoid hemorrhage                                                                       | 3 | Intracranial hemorrhage                     |
| 60 | M | Pyelonephritis<br>Septic shock                                                                | 2 | Gastrointestinal bleeding                   |

|   |    |   |                                                                                                       |    |                                        |
|---|----|---|-------------------------------------------------------------------------------------------------------|----|----------------------------------------|
|   | 70 | M | Cerebral hemorrhage<br>Head injury                                                                    | 3  | Intracranial hemorrhage                |
|   | 76 | M | Brain contusion<br>Skull fracture<br>Subdural hematoma<br>Cardiac failure<br>Ventricular fibrillation | 5  | Intracranial hemorrhage                |
|   | 89 | M | Pulmonary alveolar hemorrhage<br>Respiratory failure                                                  | 3  | Gastrointestinal, pulmonary hemorrhage |
|   | 84 | M | Acute respiratory distress syndrome<br>Pneumonia aspiration                                           | 2  | Gastrointestinal bleeding              |
|   | 84 | M | Cardiac failure                                                                                       | 4  | Gastrointestinal bleeding              |
|   | 84 | M | Subdural hematoma                                                                                     | 3  | Intracranial hemorrhage                |
|   | 82 | M | Upper gastrointestinal hemorrhage                                                                     | 2  | Gastrointestinal bleeding              |
|   | 73 | F | Brain stem hemorrhage                                                                                 | 2  | Intracranial hemorrhage                |
|   | 82 | M | Road traffic accident<br>Traumatic hemorrhage                                                         | 4  | Intrathoracic hemorrhage               |
|   | 79 | F | Tachycardia<br>Death                                                                                  | 2  | Unknown                                |
| B | 86 | M | Peritonitis                                                                                           | 1  | Unknown                                |
|   | 78 | M | Peritonitis                                                                                           | 5  | Sigmoid colectomy                      |
|   | 75 | M | Aortic dissection<br>Hemorrhage                                                                       | 1  | Aortic prosthetic replacement          |
|   | 86 | M | Death                                                                                                 | 27 | Unknown                                |
|   | 50 | M | Hemorrhagic cerebral infarction                                                                       | 3  | Decompressive craniectomy              |
|   | 72 | F | Acute myocardial infarction<br>Aortic dissection                                                      | 2  | Aortic prosthetic replacement          |
|   | 71 | F | Septic shock                                                                                          | 1  | Unknown                                |
|   | 80 | M | Sepsis                                                                                                | 2  | Unknown                                |
|   | 81 | M | Hypertension<br>Epilepsy                                                                              | 3  | Hematoma drainage                      |
|   | 84 | M | Brain herniation<br>Cerebellar hemorrhage                                                             | 4  | Hematoma removal surgery               |

|    |   |                                                                                     |   |                          |
|----|---|-------------------------------------------------------------------------------------|---|--------------------------|
| 77 | M | Intestinal obstruction<br>Gastrointestinal necrosis<br>Hemorrhage                   | 2 | Colostomy                |
| 70 | F | Hemorrhagic infarction<br>Brain edema                                               | 1 | Thrombolysis             |
| 78 | F | Multiple organ dysfunction syndrome<br>Cardiac failure<br>Mitral valve incompetence | 5 | Mitral valve replacement |

---

*AE* adverse event, *F* female, *M* male, *PT* preferred term

**Table S6** Patients with thrombotic events during the entire study period

| Group | Age (years) | Sex | Index event                                                                         | Thrombotic event                      | Period from idarucizumab administration to thrombotic event | Outcome                 | Oral anticoagulation therapy | CHADS <sub>2</sub> score |
|-------|-------------|-----|-------------------------------------------------------------------------------------|---------------------------------------|-------------------------------------------------------------|-------------------------|------------------------------|--------------------------|
| A     | 89          | M   | Intracranial hemorrhage                                                             | Embolic stroke                        | Unknown                                                     | Fatal                   | No                           | 4                        |
|       | 87          | M   | Gastrointestinal bleeding                                                           | Myocardial infarction                 | Unknown                                                     | Fatal                   | No                           | 2                        |
|       | 77          | M   | Prostate gland                                                                      | Acute myocardial infarction           | <24 h                                                       | Recovered               | No                           | 4                        |
|       | 83          | F   | Gastrointestinal bleeding                                                           | Mesenteric arterial occlusion         | <24 h                                                       | Fatal                   | No                           | 3                        |
|       | 70          | F   | Intracranial hemorrhage by trauma                                                   | Cerebral infarction                   | 1 day                                                       | Fatal                   | No                           | 2                        |
|       | 76          | M   | Retroperitoneal, gastrointestinal, intracranial, intra-abdominal bleeding by trauma | Cerebral infarction                   | 1 day                                                       | Recovered               | Yes                          | 1                        |
|       | 83          | F   | Gastrointestinal bleeding                                                           | Deep vein thrombosis                  | 3 days                                                      | Not recovered           | Yes                          | 1                        |
|       | 83          | M   | Intramuscular, retroperitoneal, intrathoracic bleeding by trauma                    | Pulmonary embolism                    | 5 days                                                      | Fatal                   | No                           | 3                        |
|       | 63          | M   | Gastrointestinal bleeding                                                           | Peripheral arterial occlusive disease | 5 days                                                      | Recovered               | Unknown                      | 3                        |
|       | 84          | F   | Gastrointestinal bleeding                                                           | Cerebral infarction                   | 6 days                                                      | Not recovered           | No                           | 5                        |
|       | 80          | M   | Intracranial hemorrhage by trauma                                                   | Cerebral infarction                   | 6 days                                                      | Not recovered           | Yes                          | 2                        |
|       | 80          | F   | Intracranial hemorrhage by trauma                                                   | Embolic stroke                        | 6 days                                                      | Recovered with sequelae | No                           | 1                        |
|       | 80          | F   | Intra-abdominal                                                                     | Embolic cerebral infarction           | 7 days                                                      | Recovered with sequelae | No                           | 2                        |
|       | 101         | F   | Gastrointestinal bleeding                                                           | Arterial occlusive disease            | 9 days                                                      | Recovered               | Unknown                      | 4                        |
|       | 81          | M   | Thoracic epidural                                                                   | Venous thrombosis                     | 9 days                                                      | Recovered               | Yes                          | 2                        |
|       | 59          | M   | Subcutaneous bleeding                                                               | Pelvic venous thrombosis              | 9 days                                                      | Recovered               | Yes                          | 0                        |
|       | 90          | F   | Intracranial hemorrhage                                                             | Embolic stroke                        | 13 days                                                     | Not recovered           | Yes                          | 1                        |
|       | 83          | F   | Intracranial hemorrhage by trauma                                                   | Pulmonary embolism                    | 16 days                                                     | Unknown                 | Yes                          | 2                        |
|       | 82          | M   | Intracranial hemorrhage by trauma                                                   | Cerebral infarction                   | 17 days                                                     | Fatal                   | No                           | 2                        |



|   |    |   |                                   |                             |         |                         |         |   |
|---|----|---|-----------------------------------|-----------------------------|---------|-------------------------|---------|---|
|   | 72 | M | Intracranial hemorrhage           | Embolic stroke              | 20 days | Fatal                   | No      | 3 |
|   | 86 | F | Intracranial hemorrhage           | Deep vein thrombosis        | 20 days | Recovered               | Yes     | 2 |
|   | 78 | M | Intracranial hemorrhage by trauma | Cerebral infarction         | 23 days | Unknown                 | No      | 3 |
| B | 78 | F | Unknown                           | Cerebral infarction         | Unknown | Recovered with sequelae | No      | 2 |
|   | 86 | F | Aortic prosthetic replacement     | Cerebral infarction         | Unknown | Not recovered           | Yes     | 1 |
|   | 72 | F | Aortic prosthetic replacement     | Acute myocardial infarction | Unknown | Fatal                   | No      | 1 |
|   | 68 | M | Aortic prosthetic replacement     | Arterial occlusive disease  | <24 h   | Recovered with sequelae | Unknown | 1 |
|   | 77 | F | Hematoma removal surgery          | Cerebral infarction         | 1 day   | Recovered with sequelae | Yes     | 2 |
|   | 74 | F | Craniotomy clipping               | Cerebral infarction         | 1 day   | Fatal                   | No      | 1 |
|   | 70 | M | STA-MCA bypass                    | Cerebral infarction         | 1 day   | Not recovered           | Unknown | 3 |
|   | 81 | F | Thrombolysis                      | Cerebral infarction         | 2 days  | Recovered with sequelae | Yes     | 5 |
|   | 57 | M | Thrombolysis                      | Arterial occlusive disease  | 2 days  | Recovered               | Unknown | 4 |
|   | 74 | M | Thrombectomy                      | Carotid artery occlusion    | 3 days  | Recovered with sequelae | Unknown | 4 |
|   | 71 | M | Thrombolysis                      | Cerebral infarction         | 5 days  | Not recovered           | Yes     | 3 |
|   | 80 | F | Unknown                           | Cerebral infarction         | 8 days  | Recovered with sequelae | No      | 1 |
|   | 69 | M | Aortic prosthetic replacement     | Cerebral infarction         | 12 days | Not recovered           | No      | 0 |
|   | 67 | M | Aortic prosthetic replacement     | Celiac artery occlusion     | 13 days | Recovered               | Yes     | 1 |
|   | 84 | M | Ventricular drainage              | Cerebral infarction         | 18 days | Recovered with sequelae | Yes     | 5 |
|   | 74 | M | Thrombectomy                      | Carotid artery occlusion    | 21 days | Not recovered           | Unknown | 4 |

CHADS<sub>2</sub> Congestive heart failure, Hypertension, Age (>65 = 1 point, >75 = 2 points), Diabetes, previous Stroke /transient ischemic attack (2 points), *F* female, *M* male, *STA-MCA* superficial temporal artery to middle cerebral artery

**Table S7** Thrombotic events and hypersensitivity by bleeding location<sup>a</sup>

| <b>Bleeding location</b>              | <b>Group A/A+B</b> |
|---------------------------------------|--------------------|
| Intracranial ( <i>n</i> )             | 208                |
| Thrombotic event                      | 11 (5.3)           |
| Cerebral infarction                   | 5 (2.4)            |
| Embolic stroke                        | 4 (1.9)            |
| Pulmonary embolism                    | 1 (0.5)            |
| Deep vein thrombosis                  | 1 (0.5)            |
| Hypersensitivity                      | 1 (0.5)            |
| Circulatory collapse                  | 1 (0.5)            |
| Gastrointestinal ( <i>n</i> )         | 133                |
| Thrombotic event                      | 7 (5.3)            |
| Cerebral infarction                   | 2 (1.5)            |
| Mesenteric arterial occlusion         | 1 (0.8)            |
| Myocardial infarction                 | 1 (0.8)            |
| Deep vein thrombosis                  | 1 (0.8)            |
| Peripheral arterial occlusive disease | 1 (0.8)            |
| Arterial occlusive disease            | 1 (0.8)            |
| Hypersensitivity                      | 0                  |
| Intrapericardial ( <i>n</i> )         | 106                |
| Thrombotic event                      | 0                  |
| Hypersensitivity                      | 0                  |
| Retroperitoneal ( <i>n</i> )          | 14                 |
| Thrombotic event                      | 2 (14.3)           |
| Cerebral infarction                   | 1 (7.1)            |
| Pulmonary embolism                    | 1 (7.1)            |
| Hypersensitivity                      | 0                  |
| Intramuscular ( <i>n</i> )            | 12                 |
| Thrombotic event                      | 1 (8.3)            |
| Pulmonary embolism                    | 1 (8.3)            |
| Hypersensitivity                      | 0                  |

*Note:* Data are presented as  $n$  (%)

<sup>a</sup> Events that occurred in both the treatment and post-treatment periods are reported. Adverse events were coded using Version 24.1 of the Medical Dictionary for Regulatory Activities

**Table S8** Thrombotic events and hypersensitivity by type of surgery/procedure<sup>a</sup>

| Type of surgery/procedure                               | Group B/A+B |
|---------------------------------------------------------|-------------|
| Neurological surgery/procedure ( <i>n</i> )             | 114         |
| Thrombotic event                                        | 8 (7.0)     |
| Cerebral infarction                                     | 6 (5.3)     |
| Carotid artery occlusion                                | 1 (0.9)     |
| Arterial occlusive disease                              | 1 (0.9)     |
| Hypersensitivity                                        | 2 (1.8)     |
| Circulatory collapse                                    | 1 (0.9)     |
| Rash                                                    | 1 (0.9)     |
| Vascular surgery/procedure ( <i>n</i> )                 | 40          |
| Thrombotic event                                        | 5 (12.5)    |
| Cerebral infarction                                     | 2 (5.0)     |
| Acute myocardial infarction                             | 1 (2.5)     |
| Arterial occlusive disease                              | 1 (2.5)     |
| Celiac artery occlusion                                 | 1 (2.5)     |
| Hypersensitivity                                        | 0           |
| Abdominal surgery/procedure ( <i>n</i> )                | 38          |
| Thrombotic event                                        | 0           |
| Hypersensitivity                                        | 1 (2.6)     |
| Circulatory collapse                                    | 1 (2.6)     |
| Orthopedic surgery/procedure ( <i>n</i> )               | 8           |
| Thrombotic event                                        | 0           |
| Hypersensitivity                                        | 1 (12.5)    |
| Drug eruption                                           | 1 (12.5)    |
| Respiratory surgery/procedure ( <i>n</i> )              | 7           |
| Thrombotic event                                        | 0           |
| Hypersensitivity                                        | 0           |
| Gynecological-urological surgery/procedure ( <i>n</i> ) | 6           |
| Thrombotic event                                        | 0           |
| Hypersensitivity                                        | 0           |

*Note:* Data are presented as  $n$  (%)

<sup>a</sup> Events that occurred in both the treatment and post-treatment periods are reported. Adverse events were coded using Version 24.1 of the Medical Dictionary for Regulatory Activities

**Table S9** Blood product use

|                                 | <b>Group A<br/>(N = 542)</b> | <b>Group B<br/>(N = 240)</b> | <b>Group A+B<br/>(N = 16)</b> | <b>Other<br/>(N = 6)</b> | <b>All<br/>(N = 804)</b> |
|---------------------------------|------------------------------|------------------------------|-------------------------------|--------------------------|--------------------------|
| Blood products/transfusions     |                              |                              |                               |                          |                          |
| Yes                             | 261 (48.2)                   | 81 (33.8)                    | 7 (43.8)                      | 2 (33.3)                 | 351 (43.7)               |
| No                              | 273 (50.4)                   | 154 (64.2)                   | 9 (56.3)                      | 4 (66.7)                 | 440 (54.7)               |
| Unknown                         | 7 (1.3)                      | 4 (1.7)                      | 0 (0.0)                       | 0 (0.0)                  | 11 (1.4)                 |
| Missing                         | 1 (0.2)                      | 1 (0.4)                      | 0 (0.0)                       | 0 (0.0)                  | 2 (0.3)                  |
| Fresh frozen plasma             |                              |                              |                               |                          |                          |
| Yes                             | 114 (21.0)                   | 50 (20.8)                    | 4 (25.0)                      | 2 (33.3)                 | 170 (21.1)               |
| No                              | 421 (77.7)                   | 186 (77.5)                   | 12 (75.0)                     | 4 (66.7)                 | 623 (77.5)               |
| Unknown                         | 7 (1.3)                      | 4 (1.7)                      | 0 (0.0)                       | 0 (0.0)                  | 11 (1.4)                 |
| Packed red blood cells          |                              |                              |                               |                          |                          |
| Yes                             | 200 (36.9)                   | 61 (25.4)                    | 3 (18.8)                      | 1 (16.7)                 | 265 (33.0)               |
| No                              | 335 (61.8)                   | 175 (72.9)                   | 13 (81.3)                     | 5 (83.3)                 | 528 (65.7)               |
| Unknown                         | 7 (1.3)                      | 4 (1.7)                      | 0 (0.0)                       | 0 (0.0)                  | 11 (1.4)                 |
| Platelets                       |                              |                              |                               |                          |                          |
| Yes                             | 35 (6.5)                     | 34 (14.2)                    | 2 (12.5)                      | 1 (16.7)                 | 72 (9.0)                 |
| No                              | 500 (92.3)                   | 202 (84.2)                   | 14 (87.5)                     | 5 (83.3)                 | 721 (89.7)               |
| Unknown                         | 7 (1.3)                      | 4 (1.7)                      | 0 (0.0)                       | 0 (0.0)                  | 11 (1.4)                 |
| Cryoprecipitate                 |                              |                              |                               |                          |                          |
| Yes                             | 1 (0.2)                      | 0 (0.0)                      | 1 (6.3)                       | 0 (0.0)                  | 2 (0.3)                  |
| No                              | 534 (98.5)                   | 236 (98.3)                   | 15 (93.8)                     | 6 (100.0)                | 791 (98.4)               |
| Unknown                         | 7 (1.3)                      | 4 (1.7)                      | 0 (0.0)                       | 0 (0.0)                  | 11 (1.4)                 |
| Whole blood                     |                              |                              |                               |                          |                          |
| Yes                             | 0 (0.0)                      | 0 (0.0)                      | 0 (0.0)                       | 0 (0.0)                  | 0 (0.0)                  |
| No                              | 535 (98.7)                   | 236 (98.3)                   | 16 (100.0)                    | 6 (100.0)                | 793 (98.6)               |
| Unknown                         | 7 (1.3)                      | 4 (1.7)                      | 0 (0.0)                       | 0 (0.0)                  | 11 (1.4)                 |
| Prothrombin complex concentrate |                              |                              |                               |                          |                          |
| Yes                             | 1 (0.2)                      | 0 (0.0)                      | 0 (0.0)                       | 0 (0.0)                  | 1 (0.1)                  |
| No                              | 534 (98.5)                   | 236 (98.3)                   | 16 (100.0)                    | 6 (100.0)                | 792 (98.5)               |

|                  |            |            |            |           |            |
|------------------|------------|------------|------------|-----------|------------|
| Unknown          | 7 (1.3)    | 4 (1.7)    | 0 (0.0)    | 0 (0.0)   | 11 (1.4)   |
| Factor VIIa      |            |            |            |           |            |
| Yes              | 0 (0.0)    | 0 (0.0)    | 0 (0.0)    | 0 (0.0)   | 0 (0.0)    |
| No               | 535 (98.7) | 236 (98.3) | 16 (100.0) | 6 (100.0) | 793 (98.6) |
| Unknown          | 7 (1.3)    | 4 (1.7)    | 0 (0.0)    | 0 (0.0)   | 11 (1.4)   |
| Volume expanders |            |            |            |           |            |
| Yes              | 4 (0.7)    | 1 (0.4)    | 0 (0.0)    | 0 (0.0)   | 5 (0.6)    |
| No               | 531 (98.0) | 235 (97.9) | 16 (100.0) | 6 (100.0) | 788 (98.0) |
| Unknown          | 7 (1.3)    | 4 (1.7)    | 0 (0.0)    | 0 (0.0)   | 11 (1.4)   |
| Tranexamic acid  |            |            |            |           |            |
| Yes              | 65 (12.0)  | 17 (7.1)   | 2 (12.5)   | 0 (0.0)   | 84 (10.4)  |
| No               | 470 (86.7) | 219 (91.3) | 14 (87.5)  | 6 (100.0) | 709 (88.2) |
| Unknown          | 7 (1.3)    | 4 (1.7)    | 0 (0.0)    | 0 (0.0)   | 11 (1.4)   |
| Other            |            |            |            |           |            |
| Yes              | 37 (6.8)   | 20 (8.3)   | 1 (6.3)    | 0 (0.0)   | 58 (7.2)   |
| No               | 498 (91.9) | 216 (90.0) | 15 (93.8)  | 6 (100.0) | 735 (91.4) |
| Unknown          | 7 (1.3)    | 4 (1.7)    | 0 (0.0)    | 0 (0.0)   | 11 (1.4)   |
| Dialysis         |            |            |            |           |            |
| Yes              | 12 (2.2)   | 8 (3.3)    | 0 (0.0)    | 1 (16.7)  | 21 (2.6)   |
| No               | 527 (97.2) | 230 (95.8) | 16 (100.0) | 5 (83.3)  | 778 (96.8) |
| Unknown          | 3 (0.6)    | 2 (0.8)    | 0 (0.0)    | 0 (0.0)   | 5 (0.6)    |

Note: Data are presented as *n* (%)

**Table S10** Restart of anticoagulation therapy by bleeding location

| <b>Bleeding location</b>                          | <b>Group A/A+B</b> |
|---------------------------------------------------|--------------------|
| Intracranial ( <i>n</i> )                         | 208                |
| Restarted any anticoagulant therapy, <i>n</i> (%) | 111 (53.4)         |
| Time to restart any anticoagulant therapy, days   |                    |
| No. of patients                                   | 62                 |
| Median (IQR)                                      | 6.7 (3.5–11.8)     |
| Gastrointestinal ( <i>n</i> )                     | 132                |
| Restarted any anticoagulant therapy, <i>n</i> (%) | 66 (50.0)          |
| Time to restart any anticoagulant therapy, days   |                    |
| No. of patients                                   | 46                 |
| Median (IQR)                                      | 4.8 (2.7–9.3)      |
| Intrapericardial ( <i>n</i> )                     | 106                |
| Restarted any anticoagulant therapy, <i>n</i> (%) | 89 (84.0)          |
| Time to restart any anticoagulant therapy, days   |                    |
| No. of patients                                   | 63                 |
| Median (IQR)                                      | 1.7 (0.9–3.6)      |
| Retroperitoneal ( <i>n</i> )                      | 14                 |
| Restarted any anticoagulant therapy, <i>n</i> (%) | 7 (50.0)           |
| Time to restart any anticoagulant therapy, days   |                    |
| No. of patients                                   | 4                  |
| Median (IQR)                                      | 5.5 (1.7–12.9)     |
| Intramuscular ( <i>n</i> )                        | 12                 |
| Restarted any anticoagulant therapy, <i>n</i> (%) | 8 (66.7)           |
| Time to restart any anticoagulant therapy, days   |                    |
| No. of patients                                   | 4                  |
| Median (IQR)                                      | 5.9 (1.7–11.9)     |

*IQR* interquartile range



**Table S11** Restart of anticoagulation therapy by type of surgery/procedure

| Type of surgery/procedure                               | Group B/A+B      |
|---------------------------------------------------------|------------------|
| Neurological surgery/procedure ( <i>n</i> )             | 112              |
| Restarted any anticoagulant therapy, <i>n</i> (%)       | 80 (71.4)        |
| Time to restart any anticoagulant therapy, days         |                  |
| No. of patients                                         | 53               |
| Median (IQR)                                            | 1.8 (1.2–6.7)    |
| Vascular surgery/procedure ( <i>n</i> )                 | 40               |
| Restarted any anticoagulant therapy, <i>n</i> (%)       | 31 (77.5)        |
| Time to restart any anticoagulant therapy, days         |                  |
| No. of patients                                         | 20               |
| Median (IQR)                                            | 2.8 (1.5–4.1)    |
| Abdominal surgery/procedure ( <i>n</i> )                | 38               |
| Restarted any anticoagulant therapy, <i>n</i> (%)       | 28 (73.7)        |
| Time to restart any anticoagulant therapy, days         |                  |
| No. of patients                                         | 21               |
| Median (IQR)                                            | 3.4 (1.7–8.9)    |
| Orthopedic surgery/procedure ( <i>n</i> )               | 8                |
| Restarted any anticoagulant therapy, <i>n</i> (%)       | 5 (62.5)         |
| Time to restart any anticoagulant therapy, days         |                  |
| No. of patients                                         | 3                |
| Median (IQR)                                            | 0.9 (0.8–3.6)    |
| Respiratory surgery/procedure ( <i>n</i> )              | 7                |
| Restarted any anticoagulant therapy, <i>n</i> (%)       | 6 (85.7)         |
| Time to restart any anticoagulant therapy, days         |                  |
| No. of patients                                         | 2                |
| Median (IQR)                                            | 13.0 (12.1–13.9) |
| Gynecological-urological surgery/procedure ( <i>n</i> ) | 6                |
| Restarted any anticoagulant therapy, <i>n</i> (%)       | 3 (50.0)         |
| Time to restart any anticoagulant therapy, days         |                  |
| No. of patients                                         | 3                |
| Median (IQR)                                            | 5.9 (5.9–36.9)   |

*IQR* interquartile range

**Table S12** Patients who were re-exposed to idarucizumab

| No. | No. of doses | Group | Reason for administration                    | Age | Sex | Dose (g) | Period until readministration of idarucizumab (days) | AEs of hypersensitivity |
|-----|--------------|-------|----------------------------------------------|-----|-----|----------|------------------------------------------------------|-------------------------|
| 1   | 1            | A     | Gastrointestinal hemorrhage                  | 88  | M   | 5.0      | 6                                                    | No                      |
|     | 2            | A     | Gastrointestinal hemorrhage                  | 88  |     | 5.0      |                                                      | No                      |
| 2   | 1            | B     | McVay method, partial bowel resection        | 85  | F   | 5.0      | 14                                                   | No                      |
|     | 2            | A     | Gastrointestinal hemorrhage                  | 85  |     | 5.0      |                                                      | No                      |
| 3   | 1            | B     | Perforation drainage                         | 89  | M   | 5.0      | 51                                                   | No                      |
|     | 2            | B     | Perforation drainage                         | 89  |     | 5.0      |                                                      | No                      |
| 4   | 1            | B     | Laparoscopic cholecystectomy                 | 73  | M   | 5.0      | 39                                                   | No                      |
|     | 2            | B     | ERCP                                         | 73  |     | 5.0      |                                                      | No                      |
| 5   | 1            | A     | Gastrointestinal hemorrhage                  | 89  | M   | 5.0      | 8                                                    | No                      |
|     | 2            | A     | Gastrointestinal hemorrhage                  | 89  |     | 5.0      |                                                      | No                      |
| 6   | 1            | A     | Gastrointestinal hemorrhage                  | 75  | M   | 5.0      | 10                                                   | No                      |
|     | 2            | A     | Gastrointestinal hemorrhage                  | 75  |     | 5.0      |                                                      | No                      |
| 7   | 1            | A     | Gastrointestinal hemorrhage                  | 63  | F   | 5.0      | 532                                                  | No                      |
|     | 2            | A     | Intracranial hemorrhage, epidural hemorrhage | 64  |     | 5.0      |                                                      | No                      |

AE adverse event, ERCP endoscopic retrograde cholangiopancreatography, F female, M male
